# Supplementary material for: Ti4+-immobilized multilayer polysaccharide coated magnetic nanoparticles for highly selective enrichment of phosphopeptides
Source: Royal Society of Chemistry journal article supplement (doi:10.1039/c4tb00479e), 2014-01-01
Supplement: c4tb00479e1.pdf [file c4tb00479e1.pdf]

## Supporting information

Table S1. Zeta-potential results of four functionalized magnetic nanoparticles.

| Magnetic nanoparticles                                                                                 | Zeta potential (mV) |
|--------------------------------------------------------------------------------------------------------|---------------------|
| Fe <sub>3</sub> O <sub>4</sub> @SiO <sub>2</sub> @(HA/CS) <sub>10</sub>                                | +4.86               |
| Fe <sub>3</sub> O <sub>4</sub> @SiO <sub>2</sub> @(HA/CS) <sub>10</sub> -NH <sub>2</sub>               | +17.4               |
| Fe <sub>3</sub> O <sub>4</sub> @SiO <sub>2</sub> @(HA/CS) <sub>10</sub> -PO <sub>3</sub> <sup>2-</sup> | -22.5               |
| Fe <sub>3</sub> O <sub>4</sub> @SiO <sub>2</sub> @(HA/CS) <sub>10</sub> -Ti <sup>4+</sup>              | +14.6               |

Table S2. List of phosphopeptides identified from tryptic digest of β-casein after enriched by Fe<sub>3</sub>O<sub>4</sub>@SiO<sub>2</sub>@(HA/CS)<sub>10</sub>-Ti<sup>4+</sup> in MALDI-TOF MS analysis

| No.            | Peptide sequence                      | Number of phosphoryl groups | Observed m/z |
|----------------|---------------------------------------|-----------------------------|--------------|
| β <sub>1</sub> | FQ[pS]EEQQQTEDELQDK                   | 1                           | 2061.70      |
| β <sub>2</sub> | FQ[pS]EEQQQTEDELQDKIHFP               | 1                           | 2555.94      |
| β <sub>3</sub> | RELEELNVPGEIVE[pS]L[pS][pS][pS]EESITR | 4                           | 3122.09      |

[pS]: phosphorylated site.

Table S3. List of phosphopeptides from diluted human serum after enriched by Fe<sub>3</sub>O<sub>4</sub>@SiO<sub>2</sub>@(HA/CS)<sub>10</sub>-Ti<sup>4+</sup> in MALDI-TOF MS analysis.

| No.             | Peptide sequence    | Number of phosphoryl groups | Observed m/z |
|-----------------|---------------------|-----------------------------|--------------|
| HS <sub>1</sub> | D[pS]GEGDFLAEGGGV   | 1                           | 1389.32      |
| HS <sub>2</sub> | AD[pS]GEGDFLAEGGGV  | 1                           | 1460.36      |
| HS <sub>3</sub> | D[pS]GEGDFLAEGGGVR  | 1                           | 1545.43      |
| HS <sub>4</sub> | AD[pS]GEGDFLAEGGGVR | 1                           | 1616.46      |

[pS]:phosphorylated site.

Table S4. List of phosphopeptides from tryptic digest of proteins extracted from nonfat milk after enriched by Fe<sub>3</sub>O<sub>4</sub>@SiO<sub>2</sub>@(HA/CS)<sub>10</sub>-Ti<sup>4+</sup> in MALDI-TOF MS analysis.

| No. | Protein    | Peptide sequence  | Number of phosphoryl groups | Observed m/z |
|-----|------------|-------------------|-----------------------------|--------------|
| 1   | αS2-casein | TVDME[pS]TEVFTK   | 1                           | 1466.47      |
| 2   | αS1-casein | VPQLEIVPN[pS]AEER | 1                           | 1660.63      |

|    |                    |                                         |   |         |
|----|--------------------|-----------------------------------------|---|---------|
| 3  | $\alpha$ S1-casein | YLGEYLIVPN[pS]AEER                      | 1 | 1832.63 |
| 4  | $\alpha$ S1-casein | DIG[pS]E[pS]TEDQAMEDIK                  | 2 | 1927.50 |
| 5  | $\alpha$ S1-casein | YKVPQLEIVPN[pS]AEER                     | 1 | 1951.76 |
| 6  | $\beta$ -casein    | FQ[pS]EEQQQTEDELQDK                     | 1 | 2601.64 |
| 7  | $\beta$ -casein    | FQ[pS]EEQQQTEDELQDKIHPE                 | 1 | 2555.83 |
| 8  | $\alpha$ S1-casein | Q[Mo]EAE[pS]I[pS][pS][pS]EEIVPN[pS]VEQK | 5 | 2737.78 |
| 9  | $\alpha$ S2-casein | NANEEEYSIG[pS][pS][pS]EEAEVATEEVK       | 3 | 2926.68 |
| 10 | $\alpha$ S2-casein | FPQ[pY]LQ[pY]LYQGPIVLNPWDQVKR           | 2 | 3024.97 |
| 11 | $\beta$ -casein    | RELEELNVPGEIVE[pS]L[pS][pS][pS]EESITR   | 4 | 3121.91 |

[pS]:phosphorylated site.
